# Supplementary material
Source: Frontiers journal article supplement (https://www.frontiersin.org/articles/167568)

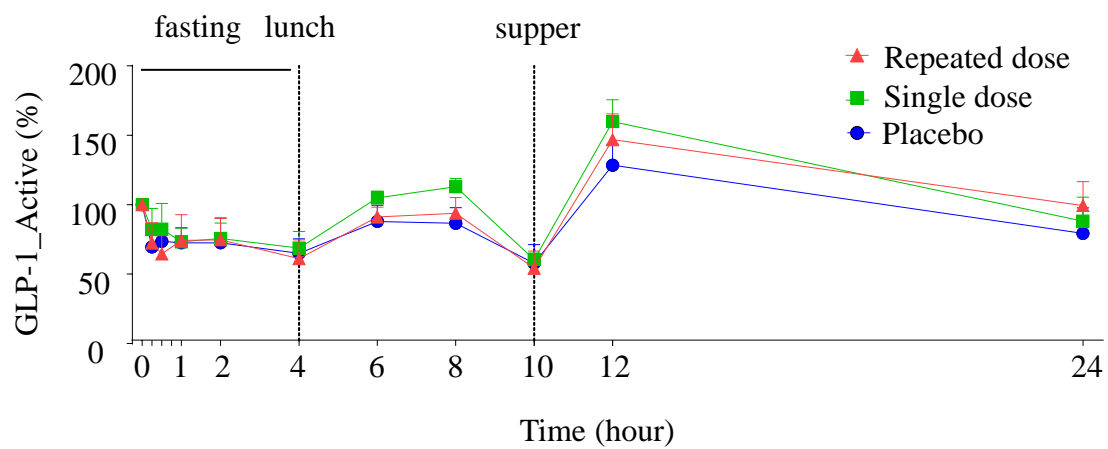

Supplement: Image_1.PDF [file Image_1.PDF]
