# Supplementary material
Source: Frontiers journal article supplement (https://www.frontiersin.org/articles/167568)
Supplement: Table_2.PDF [file Table_2.PDF]

**Supplementary Table 2. ALT and AST elevation of 4 subjects during the repeated period**

| Subject No. | Repeated-dose period (D22, D23) |        | Follow-up period (D37) |     |
|-------------|---------------------------------|--------|------------------------|-----|
|             | ALT                             | AST    | ALT                    | AST |
| 1           | 172, 157                        | 43, 48 | 26                     | 7   |
| 3           | 56, 90                          | 57, 51 | 18                     | 11  |
| 4           | 186, 166                        | 54, 46 | 13                     | 12  |
| 5           | 72, 77                          | 60, 53 | 21                     | 9   |

Normal range: ALT, 0-45 U/L; AST, 0-40 U/L  
D1 (day 1) was the day when placebo tablets were taken
